# Supplementary material
Source: Springer Nature journal article supplement (https://www.springermedizin.de/resource/supplementary/13256_2011_1993_MOESM1_ESM.pdf/9649204)

**Adenocarcinoma**

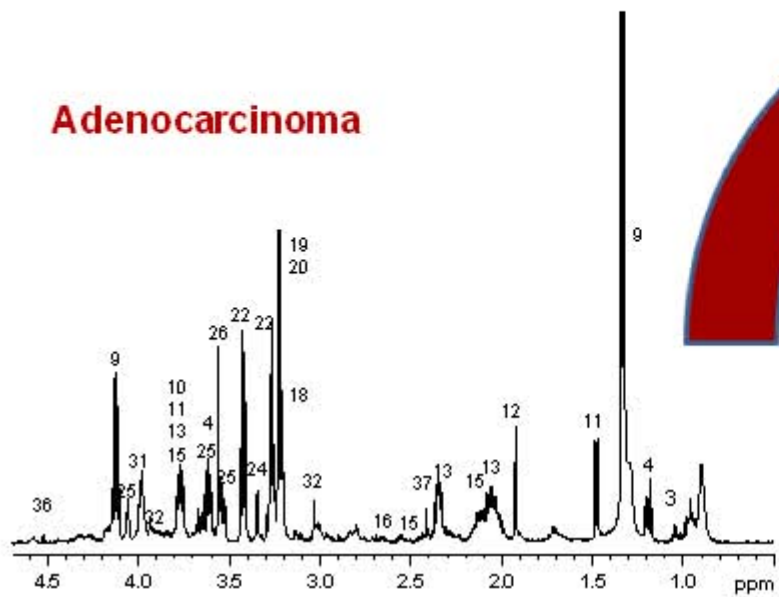

**Control**

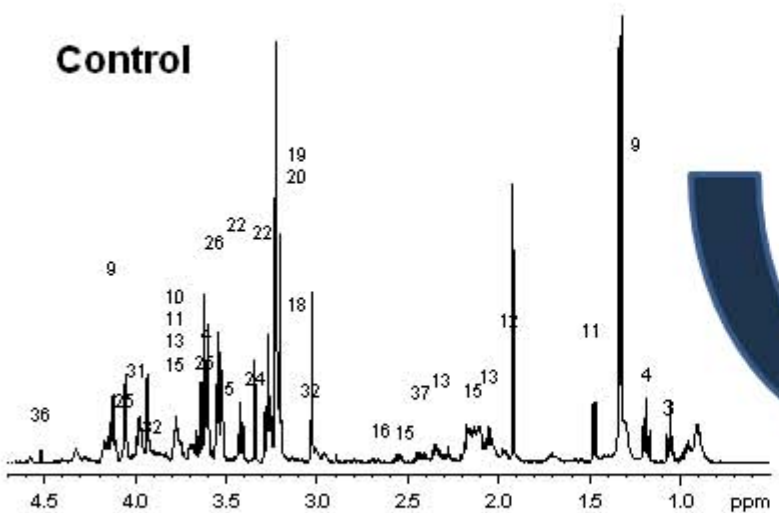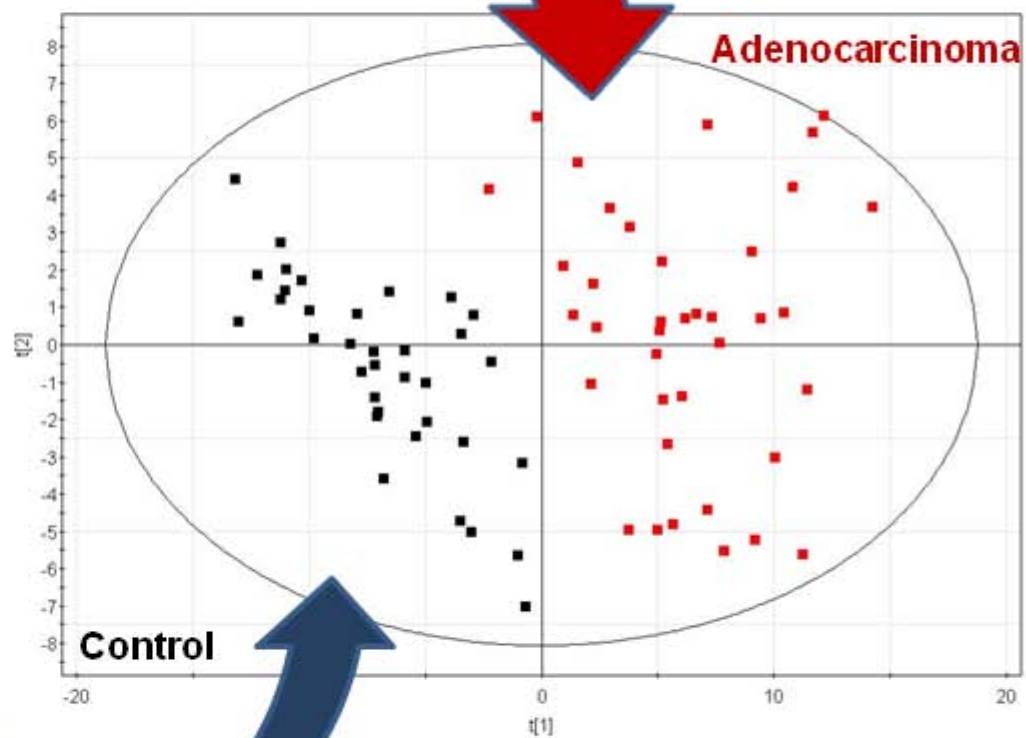

Supplement: MOESM1 [file 9649204]
